# Supplementary material for: Endothelial-like properties of claudin-low breast cancer cells promote tumor vascular permeability and metastasis
Source: PubMed Central journal article supplement (PMC3892109; doi:10.1007/s10585-013-9607-4), 2013-08-22

Supplemental Figure 1

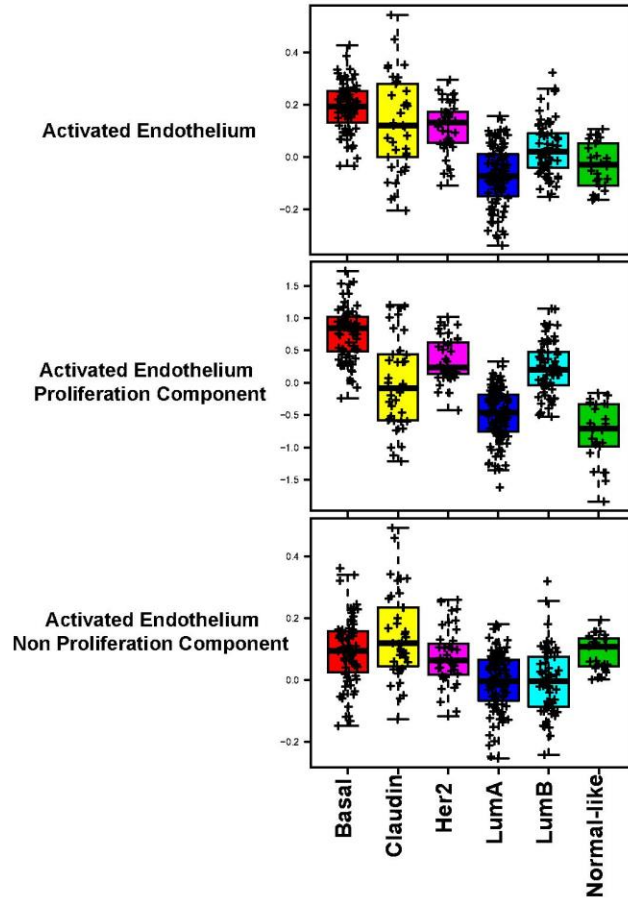

Supplemental Figure 2

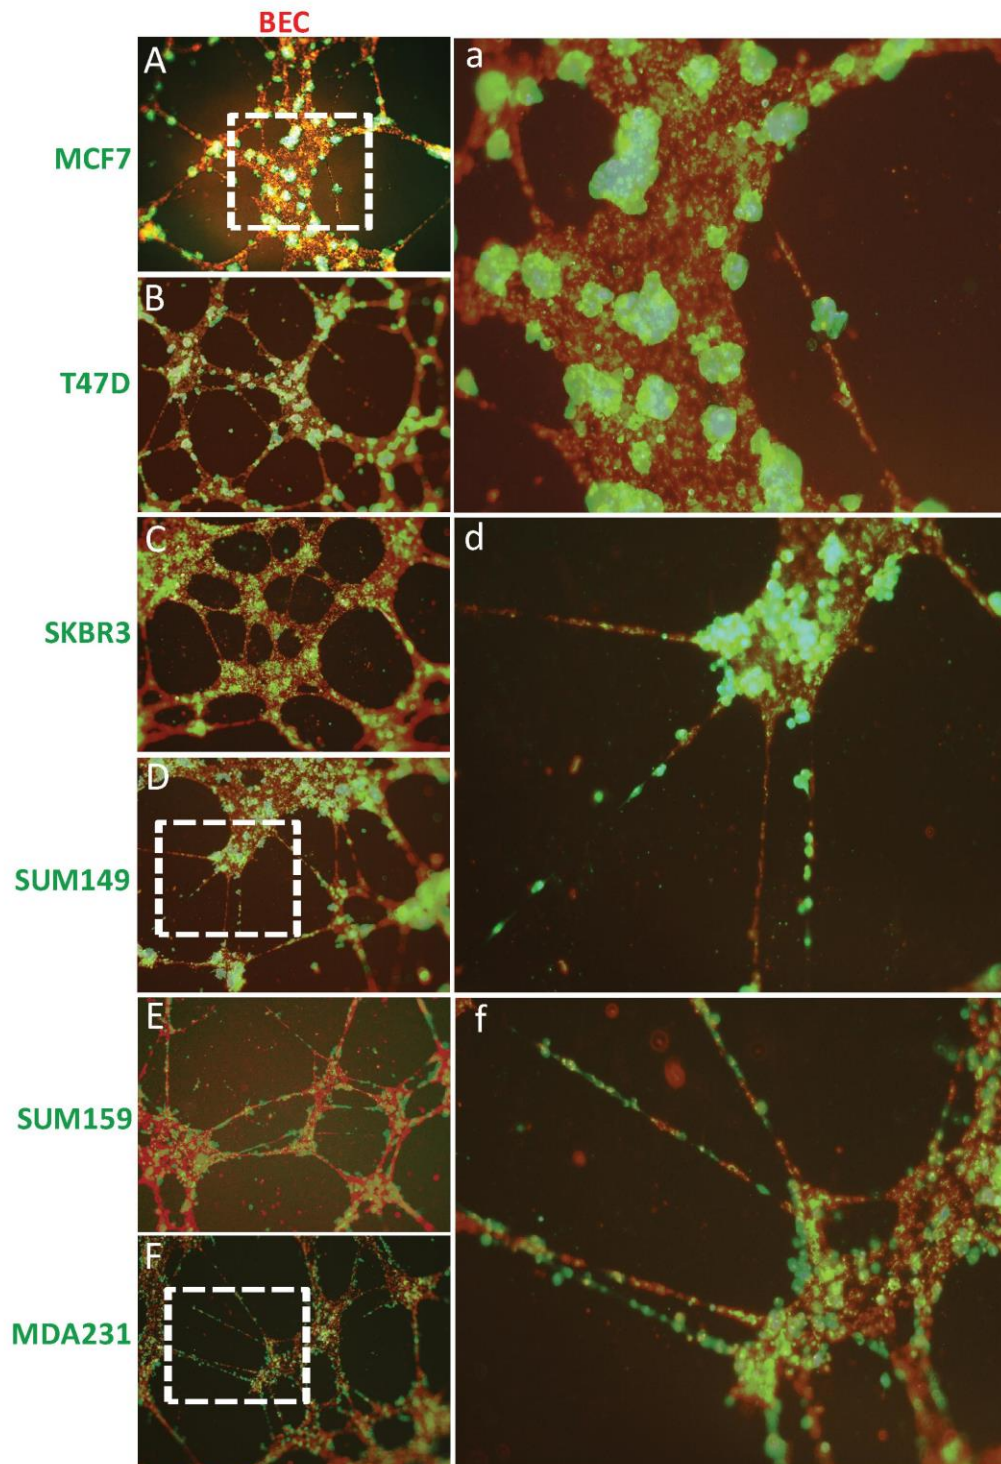

Supplemental Figure 3

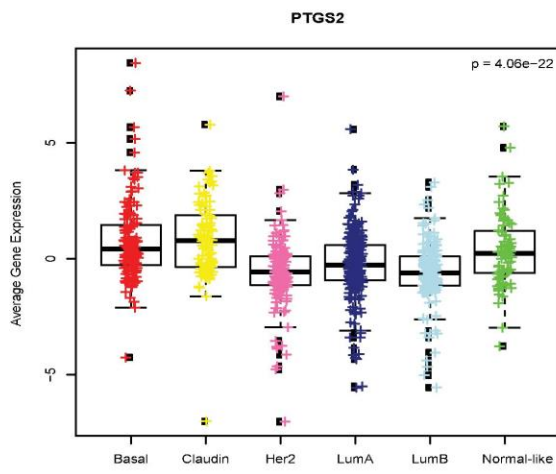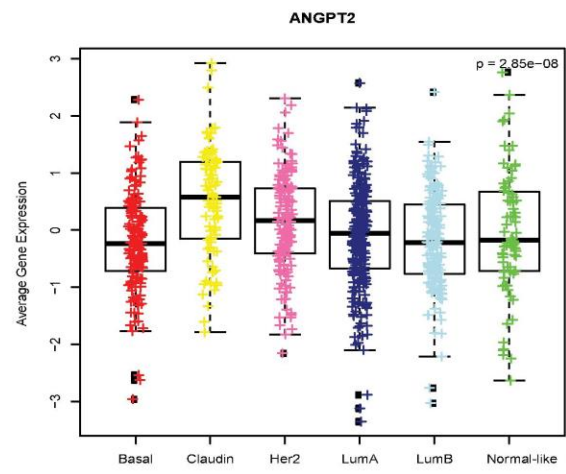

Supplemental Figure 4

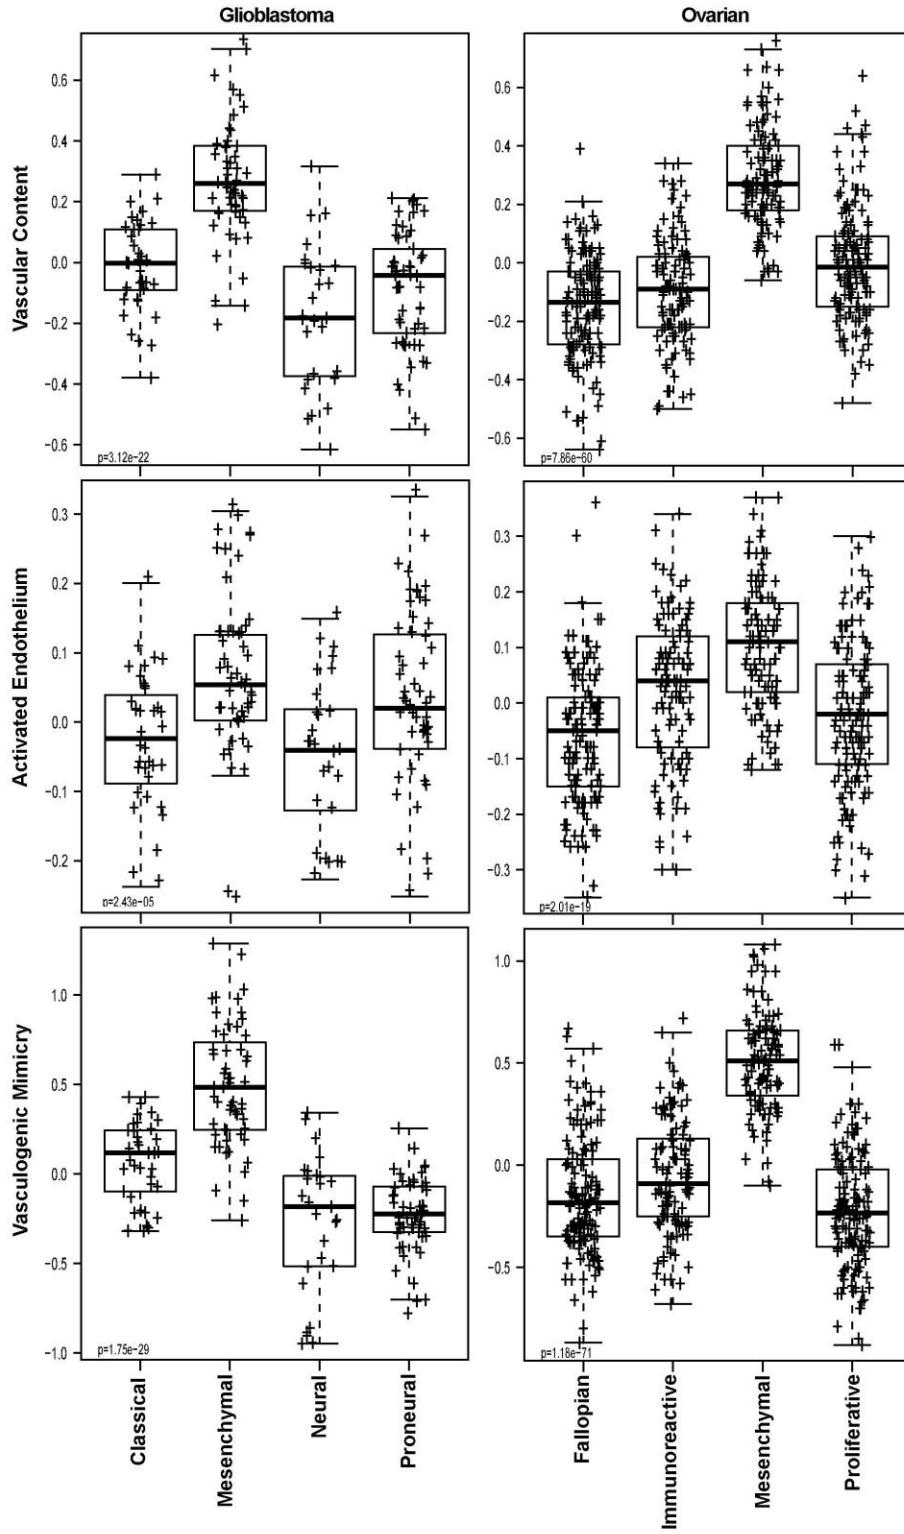

Supplement: 10585_2013_9607_MOESM1_ESM.pdf [file 10585_2013_9607_MOESM1_ESM.pdf]
