# Supplementary material for: Endothelial-like properties of claudin-low breast cancer cells promote tumor vascular permeability and metastasis
Source: Clin Exp Metastasis. 2013 Aug 22;31(1):33–45. doi: 10.1007/s10585-013-9607-4 (PMC3892109; doi:10.1007/s10585-013-9607-4)
Supplement: Supplementary file 2 — Supplementary material 2 (XLSX 47 kb) [file 10585_2013_9607_MOESM2_ESM.xlsx]

## Sheet: Supplemental Table 1
Supplemental Table 1
Gene ID	Symbol
8751	ADAM15
26289	AK5
8862	APLN
613	BCR
54796	BNC2
132720	C4orf32
857	CAV1
881	CCIN
4267	CD99
11140	CDC37
64781	CERK
10970	CKAP4
389722	CNTNAP3B-LIKE
1490	CTGF
1543	CYP1A1
1627	DBN1
11080	DNAJB4
1889	ECE1
2202	EFEMP1
51162	EGFL7
30846	EHD2
2004	ELK3
2048	EPHB2
90952	ESAM
11082	ESM1
283849	EXOC3L1
131583	FAM43A
54751	FBLIM1
79147	FKRP
10750	GRAP
84717	HDGFRP2
64399	HHIP
3204	HOXA7
3216	HOXB6
3217	HOXB7
8692	HYAL2
10643	IGF2BP3
84456	L3MBTL3
3910	LAMA4
3912	LAMB1
96626	LIMS3
4017	LOXL2
54682	MANSC1
115123	MARCH3
4162	MCAM
1954	MEGF8
4237	MFAP2
4242	MFNG
84777	MGC11082
4312	MMP1
4319	MMP10
10763	NES
4846	NOS3
283208	P4HA3
55742	PARVA
5138	PDE2A
8544	PIR
29941	PKN3
5351	PLOD1
23129	PLXND1
9647	PPM1F
10544	PROCR
11098	PRSS23
284119	PTRF
5865	RAB3B
26064	RAI14
57190	SEPN1
6525	SMTN
8877	SPHK1
55351	STK32B
7010	TEK
55754	TMEM30A
25941	TPGS2
84617	TUBB6

## Sheet: Supplemental Table 2
Supplemental Table 2
Gene ID	Symbol
20	ABCA2
79814	AGMAT
54443	ANLN
333	APLP1
115557	ARHGEF25
379	ARL4D
253982	ASPHD1
84752	B3GNT9
8702	B4GALT4
329	BIRC2
641	BLM
669	BPGM
672	BRCA1
84446	BRSK1
701	BUB1B
90417	C15orf23
55732	C1orf112
389336	C5orf46
79783	C7orf10
84688	C9orf24
55071	C9orf40
771	CA12
6368	CCL23
1062	CENPE
8208	CHAF1B
26958	COPG2
285521	COX18
1543	CYP1A1
23002	DAAM1
9787	DLGAP5
26052	DNM3
54935	DUSP23
219670	ENKUR
2115	ETV1
2119	ETV5
201627	FAM116A
151176	FAM132B
26261	FBXO24
84824	FCRLA
51303	FKBP11
79951	FLJ11783
202020	FLJ39653
2335	FN1
2527	FUT5
221914	GPC2
55355	HJURP
79366	HMGN5
3176	HNMT
3589	IL11
50615	IL21R
27178	IL37
3619	INCENP
23189	KANK1
7044	LEFTY2
344887	LOC344887
388160	LOC388160
84918	LRP11
7804	LRP8
4052	LTBP1
4058	LTK
4116	MAGOH
22983	MAST1
84879	MFSD2A
113691	MGC16703
23531	MMD
4603	MYBL1
58498	MYL7
2831	NPBWR1
2908	NR3C1
348995	NUP43
734	OSGIN2
5141	PDE4A
9487	PIGL
5321	PLA2G4A
64208	POPDC3
25766	PRPF40B
5743	PTGS2
25788	RAD54B
8438	RAD54L
317671	RFESD
5990	RFX2
55298	RNF121
6240	RRM1
170591	S100Z
6446	SGK1
9047	SH2D2A
90525	SHF
7922	SLC39A7
28968	SLC6A16
6553	SLC9A5
6578	SLCO2A1
4092	SMAD7
6604	SMARCD3
6615	SNAI1
6695	SPOCK1
27286	SRPX2
7022	TFAP2C
7037	TFRC
7045	TGFBI
84314	TMEM107
80757	TMEM121
202915	TMEM184A
80975	TMPRSS5
286527	TMSB15B
90313	TP53I13
7216	TRO
83538	TTC25
56886	UGGT1
11169	WDHD1
29062	WDR91

## Sheet: Supplemental Table 3
Supplemental Table 3
Variable	Combined 855				UNC 254				METABRIC 1971				MDACC 493				MERGED 550
	Hazard Ratio	Lower 0.95	Upper 0.95	p-value	Hazard Ratio	Lower 0.95	Upper 0.95	p-value	Hazard Ratio	Lower 0.95	Upper 0.95	p-value	Hazard Ratio	Lower 0.95	Upper 0.95	p-value	Hazard Ratio	Lower 0.95	Upper 0.95	p-value
Subtype LumB vs LumA	1.6929	1.2461	2.3	0.000759	2.962	1.413	6.207	0.004032	1.525	1.2256	1.898	0.000155	1.715	0.833	3.531	0.143203	3.475	2.189	5.516	1.27e-07
Subtype Her2 vs LumA	1.9944	1.4606	2.723	1.4e-05	6.501	3.0488	13.861	1.26e-06	2.014	1.5851	2.558	9.85e-09	3.81	1.7842	8.137	0.0005	3.528	2.1352	5.829	8.62e-07
Subtype Basal vs LumA	2.0614	1.5027	2.828	7.27e-06	4.164	1.9929	8.701	0.000148	2.11	1.669	2.667	4.27e-10	3.834	2.1999	6.682	2.12e-06	3.06	1.8297	5.117	2.02e-05
Subtype Claudin vs LumA	1.5094	1.028	2.216	0.035649	2.982	1.3216	6.73	0.008502	1.313	0.9934	1.737	0.055664	3.226	1.7224	6.041	0.000254	1.698	0.8993	3.206	0.103
Subtype Normal vs LumA	0.9731	0.6264	1.512	0.903456	3.14	0.8831	11.168	0.077079	1.157	0.8618	1.554	0.331226	1.316	0.4426	3.911	0.621617	1.663	0.8921	3.1	0.109
ER (+ vs. -)	0.6285	0.5073	0.7787	2.15e-05	0.4711	0.2999	0.7401	0.00109	0.6107	0.5199	0.7173	1.92e-09	0.3641	0.2499	0.5305	1.42e-07	0.7175	0.5268	0.9773	0.0352
HER2 (+ vs. -)	1.384	1.089	1.759	0.00798	1.959	1.209	3.177	0.00637	1.489	1.257	1.763	4.03e-06	0.8327	0.4759	1.457	0.521	1.359	0.9713	1.901	0.0735
Wallgard	1.022	0.7255	1.44	0.901	1.022	0.5027	2.076	0.953	1.085	0.9405	1.252	0.263	2.347	1.397	3.944	0.00127	0.8206	0.5391	1.249	0.356
Vascular Content	1.637	1.2	2.232	0.00185	2.339	0.8844	6.187	0.0868	1.002	0.7916	1.268	0.987	1.638	0.9516	2.82	0.0749	1.503	0.9589	2.356	0.0756
VEGF Hypoxia	1.438	1.279	1.618	1.29e-09	2.586	1.911	3.5	7.68e-10	1.291	1.211	1.375	4e-15	2.19	1.674	2.864	1.04e-08	1.678	1.393	2.022	5.21e-08
Tumor Vasculature A	0.98	0.73	1.318	0.891	0.3169	0.1478	0.6793	0.003	1.01	0.85	1.19	0.92	0.25	0.14	0.46	1.07e-05	1.027	0.6792	1.552	0.9
Tumor Vasculature B	2.097	1.262	3.483	0.004	1.53	0.47	4.94	0.477	1.26	0.98	1.62	0.063	1.01	0.45	2.22	0.988	2.366	1.26	4.393	0.007
Vasculogenic Mimicry	1.4	1.14	1.71	0.0011	1.79	1.04	3.1	0.037	1.242	1.09	1.42	0.00148	1.665	1.2	2.32	0.0024	1.52	1.13	2.04	0.0052
Proliferation	1.868	1.489	2.344	6.57e-08	1.874	1.395	2.519	3.09e-05	1.284	1.213	1.359	<2e-16	1.546	1.245	1.919	7.78e-05	1.449	1.285	1.634	1.54e-09
Activated Endothelium	3.875	2.353	6.38	1.02e-07	29.07	7.793	108.5	5.26e-07	3.774	2.537	5.615	5.6e-11	19.14	6.686	54.78	3.78e-08	9.102	4.386	18.89	3.06e-09
Act.Endo. Non Proliferation	3.414	1.864	6.255	7.02e-05	25.65	4.639	141.8	0.0002	1.962	1.231	3.128	0.00462	22.06	6.653	73.13	4.22e-07	-	-	-	-
Act.Endo. Proliferation	1.301	1.173	1.444	6.7e-07	2.116	1.522	2.941	8.29e-06	1.433	1.314	1.564	5.55e-16	1.401	1.137	1.726	0.00155	-	-	-	-

## Sheet: Supplemental Table 4
Supplemental Table 4
COMBINED 855	Hazard Ratio	lower 0.95	upper 0.95	p-value	UNC 254	Hazard Ratio	lower 0.95	upper 0.95	p-value	METABRIC 1971	Hazard Ratio	lower 0.95	upper 0.95	p-value	MDACC 493	Hazard Ratio	lower 0.95	upper 0.95	p-value	MERGED 550	Hazard Ratio	lower 0.95	upper 0.95	p-value
Subtype LumB	1.2561	0.8169	1.931	0.2989	Subtype LumB	2.176	0.9282	5.1	0.073681	Subtype LumB	1.05	0.8101	1.362	0.711	Subtype LumB	1.354	0.5926	3.095	0.47203	Subtype LumB	2.473	1.4517	4.211	0.000862
Subtype Her2	1.5688	1.0574	2.328	0.0253	Subtype Her2	4.562	1.8606	11.187	0.000911	Subtype Her2	1.367	1.0332	1.809	0.0286	Subtype Her2	3.15	1.382	7.178	0.00634	Subtype Her2	2.311	1.2632	4.227	0.00656
Subtype Basal	1.5859	1.0509	2.393	0.0281	Subtype Basal	2.551	0.9403	6.922	0.065911	Subtype Basal	1.207	0.8808	1.654	0.2419	Subtype Basal	2.986	1.4817	6.018	0.00222	Subtype Basal	1.79	0.924	3.469	0.084374
Subtype Claudin	1.2542	0.8163	1.927	0.3013	Subtype Claudin	2.234	0.8902	5.607	0.086876	Subtype Claudin	1.047	0.7787	1.408	0.7607	Subtype Claudin	2.811	1.4353	5.504	0.00258	Subtype Claudin	1.341	0.6887	2.612	0.388
Subtype Normal	0.9662	0.6219	1.501	0.8784	Subtype Normal	3.054	0.8587	10.864	0.084595	Subtype Normal	1.15	0.8564	1.545	0.3524	Subtype Normal	1.319	0.4438	3.922	0.61817	Subtype Normal	1.596	0.855	2.978	0.14212
Proliferation	1.4284	0.996	2.049	0.0526	Proliferation	1.365	0.8831	2.111	0.161334	Proliferation	1.242	1.1448	1.348	1.97e-07	Proliferation	1.186	0.883	1.593	0.2569	Proliferation	1.259	1.0546	1.502	0.010803
Subtype LumB	1.7781	1.2956	2.44	0.000366	Subtype LumB	2.9478	1.4043	6.188	0.004272	Subtype LumB	1.605	1.2842	2.007	3.23e-05	Subtype LumB	1.821	0.8819	3.761	0.105165	Subtype LumB	3.575	2.2344	5.72	1.08e-07
Subtype Her2	2.0018	1.4659	2.734	1.27e-05	Subtype Her2	6.5015	3.0493	13.862	1.26e-06	Subtype Her2	2	1.5745	2.541	1.37e-08	Subtype Her2	3.676	1.7209	7.852	0.000774	Subtype Her2	3.537	2.1403	5.844	8.23e-07
Subtype Basal	2.1073	1.533	2.897	4.4e-06	Subtype Basal	4.1484	1.9834	8.677	0.000158	Subtype Basal	2.11	1.6694	2.668	4.23e-10	Subtype Basal	3.549	2.0282	6.21	9.11e-06	Subtype Basal	3.105	1.8531	5.204	1.69e-05
Subtype Claudin	1.4333	0.9673	2.124	0.072783	Subtype Claudin	3.1157	1.229	7.898	0.016643	Subtype Claudin	1.162	0.8627	1.566	0.3228	Subtype Claudin	2.301	1.1314	4.68	0.021408	Subtype Claudin	1.599	0.8254	3.099	0.164
Subtype Normal	0.9487	0.6095	1.477	0.815465	Subtype Normal	3.3154	0.827	13.291	0.090673	Subtype Normal	1.07	0.791	1.448	0.6604	Subtype Normal	1.165	0.39	3.479	0.784759	Subtype Normal	1.64	0.8783	3.061	0.121
Wallgard	1.2661	0.8666	1.85	0.222597	Wallgard	0.9129	0.3535	2.357	0.8506	Wallgard	1.222	1.0318	1.448	0.0202	Wallgard	1.96	1.0081	3.809	0.047289	Wallgard	1.169	0.7294	1.875	0.516
Subtype LumB	1.9631	1.4324	2.69	2.73e-05	Subtype LumB	3	1.4305	6.29	0.003643	Subtype LumB	1.575	1.2584	1.97	7.21e-05	Subtype LumB	1.798	0.8634	3.742	0.117012	Subtype LumB	4.073	2.5446	6.52	4.89e-09
Subtype Her2	2.1171	1.5485	2.894	2.6e-06	Subtype Her2	6.151	2.8532	13.259	3.57e-06	Subtype Her2	2.035	1.6009	2.586	6.41e-09	Subtype Her2	3.841	1.7978	8.205	0.000512	Subtype Her2	3.756	2.2711	6.211	2.52e-07
Subtype Basal	1.9818	1.4435	2.721	2.34e-05	Subtype Basal	3.997	1.901	8.403	0.000258	Subtype Basal	2.119	1.6759	2.679	3.47e-10	Subtype Basal	3.781	2.1673	6.597	2.82e-06	Subtype Basal	3.119	1.8643	5.218	1.48e-05
Subtype Claudin	1.1912	0.7966	1.781	0.394	Subtype Claudin	2.495	0.9875	6.304	0.053183	Subtype Claudin	1.232	0.9164	1.658	0.167	Subtype Claudin	2.936	1.4909	5.781	0.001838	Subtype Claudin	1.209	0.6241	2.341	0.574216
Subtype Normal	0.9859	0.6345	1.532	0.949	Subtype Normal	2.704	0.7233	10.106	0.139284	Subtype Normal	1.138	0.8465	1.53	0.391	Subtype Normal	1.285	0.4314	3.825	0.652752	Subtype Normal	1.655	0.888	3.086	0.112717
Vascular Content	1.9849	1.4095	2.795	8.66e-05	Vascular Content	1.666	0.4785	5.798	0.422679	Vascular Content	1.192	0.9076	1.565	0.207	Vascular Content	1.274	0.6637	2.446	0.466673	Vascular Content	2.555	1.5463	4.221	0.000251
Subtype LumB	1.83	1.34	2.497	0.00013	Subtype LumB	2.96	1.41	6.21	0.004	Subtype LumB	1.587	1.27	1.98	3.92e-05	Subtype LumB	1.94	0.9335	4.015	0.076	Subtype LumB	3.71	2.33	5.9	3.01e-08
Subtype Her2	1.92	1.4	2.624	4.3e-05	Subtype Her2	5.93	2.68	13.11	1.08e-05	Subtype Her2	1.891	1.48	2.41	2.7e-07	Subtype Her2	3.57	1.6689	7.644	0.001	Subtype Her2	3.05	1.82	5.08	1.94e-05
Subtype Basal	1.95	1.42	2.684	3.8e-05	Subtype Basal	4.03	1.91	8.45	0.00023	Subtype Basal	2.015	1.59	2.55	6.2e-10	Subtype Basal	3.79	2.1732	6.601	2.62e-06	Subtype Basal	2.87	1.72	4.81	6.06e-05
Subtype Claudin	1.23	0.82	1.837	0.32	Subtype Claudin	2.6	1.02	6.36	0.045	Subtype Claudin	1.091	0.81	1.48	0.574	Subtype Claudin	2.4	1.2143	4.723	0.011	Subtype Claudin	1.23	0.63	2.39	0.54
Subtype Normal	0.94	0.61	1.465	0.79	Subtype Normal	2.94	0.82	10.57	0.098	Subtype Normal	1.098	0.82	1.48	0.54	Subtype Normal	1.22	0.4088	3.624	0.72	Subtype Normal	1.58	0.85	2.95	0.15
Vasculogenic Mimicry	1.45	1.16	1.798	0.00088	Vasculogenic Mimicry	1.3	0.65	2.59	0.453	Vasculogenic Mimicry	1.278	1.1	1.49	0.0017	Vasculogenic Mimicry	1.57	1.061	2.314	0.024	Vasculogenic Mimicry	1.72	1.25	2.37	0.00085
Subtype LumB	1.6033	1.1788	2.181	0.00262	Subtype LumB	2.7191	1.2962	5.704	0.00814	Subtype LumB	1.427	1.1445	1.778	0.00157	Subtype LumB	1.631	0.791	3.364	0.1852	Subtype LumB	3.0658	1.9248	4.883	2.39e-06
Subtype Her2	1.6539	1.1988	2.282	0.00218	Subtype Her2	2.6757	1.1541	6.203	0.02179	Subtype Her2	1.524	1.172	1.982	0.00167	Subtype Her2	2.746	1.226	6.15	0.0141	Subtype Her2	2.5119	1.485	4.249	0.000594
Subtype Basal	1.2888	0.8888	1.869	0.1809	Subtype Basal	1.1988	0.492	2.921	0.68983	Subtype Basal	1.355	1.0143	1.811	0.0398	Subtype Basal	2.268	1.1173	4.604	0.0234	Subtype Basal	1.5034	0.8264	2.735	0.181772
Subtype Claudin	0.9533	0.6198	1.466	0.8278	Subtype Claudin	0.6709	0.2472	1.821	0.43347	Subtype Claudin	0.903	0.6586	1.238	0.5261	Subtype Claudin	2.112	1.0271	4.343	0.0421	Subtype Claudin	0.9702	0.4896	1.923	0.930947
Subtype Normal	0.872	0.56	1.358	0.54454	Subtype Normal	1.0814	0.2865	4.082	0.90812	Subtype Normal	1.082	0.8047	1.454	0.60228	Subtype Normal	1.147	0.3837	3.43	0.8059	Subtype Normal	1.4426	0.7715	2.698	0.251143
VEGF Hypoxia	1.4386	1.2394	1.67	1.73e-06	VEGF Hypoxia	3.2553	2.0836	5.086	2.16e-07	VEGF Hypoxia	1.262	1.1572	1.377	1.51e-07	VEGF Hypoxia	1.609	1.0951	2.364	0.0154	VEGF Hypoxia	1.7604	1.3864	2.235	3.45e-06
Subtype LumB	1.66	1.2198	2.26	0.00127	Subtype LumB	3.2838	1.55837	6.9196	0.00177	Subtype LumB	1.494	1.1996	1.861	0.000337	Subtype LumB	2.1376	1.0183	4.4869	0.04464	Subtype LumB	3.5295	2.213	5.629	1.19e-07
Subtype Her2	2.005	1.4685	2.739	1.21e-05	Subtype Her2	5.3943	2.50054	11.6367	1.74e-05	Subtype Her2	2.06	1.62	2.619	3.69e-09	Subtype Her2	4.0147	1.8769	8.5877	0.00034	Subtype Her2	3.4991	2.1152	5.788	1.08e-06
Subtype Basal	2.271	1.5851	3.254	7.82e-06	Subtype Basal	2.0496	0.80839	5.1965	0.13057	Subtype Basal	2.435	1.8624	3.183	7.62e-11	Subtype Basal	2.6553	1.448	4.8692	0.0016	Subtype Basal	2.9093	1.6682	5.074	0.000168
Subtype Claudin	1.751	1.1005	2.785	0.01807	Subtype Claudin	0.8389	0.22684	3.1022	0.79229	Subtype Claudin	1.6	1.1487	2.229	0.005448	Subtype Claudin	1.7999	0.858	3.7758	0.11997	Subtype Claudin	1.5747	0.7741	3.204	0.210149
Subtype Normal	1.015	0.6495	1.587	0.94646	Subtype Normal	1.8977	0.49971	7.2069	0.3467	Subtype Normal	1.233	0.9135	1.665	0.170902	Subtype Normal	0.9592	0.3156	2.9155	0.9415	Subtype Normal	1.6178	0.8585	3.049	0.136762
Tumor Vascular A	1.263	0.838	1.903	0.26477	Tumor Vascular A	0.1281	0.02462	0.6663	0.01458	Tumor Vascular A	1.286	1.0218	1.619	0.032049	Tumor Vascular A	0.2908	0.1202	0.7033	0.00612	Tumor Vascular A	0.8792	0.5108	1.513	0.642265
Subtype LumB	1.69	1.2443	2.296	0.000785	Subtype LumB	2.938	1.3878	6.218	0.004854	Subtype LumB	1.508	1.2107	1.877	0.000243	Subtype LumB	1.771	0.8513	3.686	0.126179	Subtype LumB	3.42	2.1543	5.43	1.84e-07
Subtype Her2	1.915	1.4004	2.62	4.74e-05	Subtype Her2	6.445	2.9891	13.894	2e-06	Subtype Her2	1.992	1.5675	2.532	1.76e-08	Subtype Her2	3.928	1.8226	8.464	0.000479	Subtype Her2	3.452	2.0883	5.706	1.35e-06
Subtype Basal	2.098	1.5289	2.879	4.45e-06	Subtype Basal	4.173	1.996	8.725	0.000147	Subtype Basal	2.098	1.6595	2.652	5.85e-10	Subtype Basal	3.858	2.2123	6.727	1.95e-06	Subtype Basal	3.193	1.9057	5.349	1.04e-05
Subtype Claudin	1.449	0.9853	2.13	0.059453	Subtype Claudin	2.972	1.3145	6.717	0.008867	Subtype Claudin	1.272	0.9583	1.687	0.095992	Subtype Claudin	3.277	1.7448	6.153	0.000223	Subtype Claudin	1.731	0.9166	3.268	0.0907
Subtype Normal	1.005	0.6463	1.562	0.983165	Subtype Normal	3.18	0.8819	11.468	0.077078	Subtype Normal	1.175	0.8741	1.579	0.285617	Subtype Normal	1.285	0.4308	3.834	0.652834	Subtype Normal	1.833	0.9788	3.431	0.0584
Tumor Vascular B	1.967	1.1689	3.311	0.010849	Tumor Vascular B	1.081	0.3381	3.453	0.895952	Tumor Vascular B	1.198	0.9292	1.544	0.163735	Tumor Vascular B	0.803	0.3476	1.855	0.607475	Tumor Vascular B	2.22	1.1564	4.261	0.0165
Subtype LumB	1.4327	1.0333	1.987	0.03107	Subtype LumB	2.133	0.99	4.598	0.05308	Subtype LumB	1.377	1.0966	1.729	0.005893	Subtype LumB	1.383	0.6631	2.883	0.38748	Subtype LumB	2.5924	1.597	4.208	0.000116
Subtype Her2	1.6918	1.2157	2.354	0.00182	Subtype Her2	3.537	1.5021	8.33	0.00384	Subtype Her2	1.689	1.2988	2.197	9.25e-05	Subtype Her2	3.012	1.3934	6.509	0.00505	Subtype Her2	2.3327	1.3621	3.995	0.002029
Subtype Basal	1.4382	0.967	2.139	0.0728	Subtype Basal	1.741	0.6801	4.459	0.24757	Subtype Basal	1.664	1.2631	2.192	0.000293	Subtype Basal	2.268	1.1935	4.31	0.01241	Subtype Basal	1.5204	0.8279	2.792	0.176718
Subtype Claudin	1.1118	0.7186	1.72	0.63406	Subtype Claudin	1.34	0.4864	3.689	0.5717	Subtype Claudin	1.091	0.8063	1.476	0.572263	Subtype Claudin	2.057	1.0327	4.096	0.04021	Subtype Claudin	0.9215	0.4579	1.855	0.818727
Subtype Normal	0.9155	0.5881	1.425	0.69564	Subtype Normal	2.373	0.6607	8.523	0.18532	Subtype Normal	1.154	0.8591	1.55	0.341823	Subtype Normal	1.176	0.3951	3.503	0.77035	Subtype Normal	1.4414	0.7705	2.696	0.252555
Activated Endothelium	2.6879	1.3869	5.21	0.0034	Activated Endothelium	18.406	2.4466	138.473	0.00467	Activated Endothelium	2.262	1.371	3.733	0.001399	Activated Endothelium	7.46	2.0505	27.136	0.00229	Activated Endothelium	7.9419	3.0838	20.453	1.76e-05
Subtype LumB	1.6307	1.1988	2.218	0.00184	Subtype LumB	2.817	1.3424	5.911	0.00617	Subtype LumB	1.517	1.2189	1.888	0.000189	Subtype LumB	1.769	0.859	3.643	0.121719	-	-	-	-	-
Subtype Her2	1.9195	1.404	2.624	4.37e-05	Subtype Her2	5.163	2.364	11.274	3.81e-05	Subtype Her2	1.945	1.5244	2.482	8.76e-08	Subtype Her2	3.623	1.6966	7.738	0.000883	-	-	-	-	-
Subtype Basal	1.7095	1.2136	2.408	0.00216	Subtype Basal	3.077	1.4027	6.748	0.00504	Subtype Basal	2.027	1.5938	2.577	8.28e-09	Subtype Basal	2.739	1.5319	4.897	0.000677	-	-	-	-	-
Subtype Claudin	1.2122	0.8017	1.833	0.36161	Subtype Claudin	1.903	0.7652	4.735	0.16626	Subtype Claudin	1.22	0.9079	1.64	0.187017	Subtype Claudin	2.125	1.0953	4.123	0.025807	-	-	-	-	-
Subtype Normal	0.9468	0.6092	1.472	0.80817	Subtype Normal	2.354	0.6483	8.546	0.19317	Subtype Normal	1.153	0.8583	1.548	0.344804	Subtype Normal	1.091	0.3658	3.254	0.875788	-	-	-	-	-
ActEndoNonProliferation	2.6826	1.3405	5.368	0.0053	ActEndoNonProliferation	11.021	1.3289	91.408	0.02619	ActEndoNonProliferation	1.473	0.8828	2.456	0.138249	ActEndoNonProliferation	11.232	2.8882	43.684	0.000482	-	-	-	-	-
Subtype LumB	1.4712	1.0124	2.138	0.04293	Subtype LumB	2.093	0.9204	4.759	0.07807	Subtype LumB	1.19	0.9275	1.528	0.17105	Subtype LumB	1.645	0.746	3.629	0.217275	-	-	-	-	-
Subtype Her2	1.7389	1.1952	2.53	0.00383	Subtype Her2	4.218	1.7528	10.149	0.00132	Subtype Her2	1.493	1.1287	1.975	0.00498	Subtype Her2	3.677	1.6394	8.245	0.00158	-	-	-	-	-
Subtype Basal	1.6817	1.0804	2.618	0.02129	Subtype Basal	2.133	0.7761	5.86	0.14198	Subtype Basal	1.352	0.9824	1.86	0.06414	Subtype Basal	3.663	1.8941	7.083	0.000114	-	-	-	-	-
Subtype Claudin	1.351	0.8862	2.059	0.16197	Subtype Claudin	2.076	0.8287	5.2	0.11902	Subtype Claudin	1.138	0.8507	1.521	0.38449	Subtype Claudin	3.153	1.6421	6.054	0.000561	-	-	-	-	-
Subtype Normal	0.9371	0.6009	1.461	0.77436	Subtype Normal	3.172	0.8921	11.28	0.07449	Subtype Normal	1.168	0.87	1.569	0.30085	Subtype Normal	1.327	0.4455	3.953	0.611313	-	-	-	-	-
ActEndoProliferation	1.106	0.9484	1.29	0.19901	ActEndoProliferation	1.614	0.9809	2.655	0.05956	ActEndoProliferation	1.305	1.1485	1.484	4.51e-05	ActEndoProliferation	1.035	0.7934	1.349	0.801119	-	-	-	-	-

## Sheet: Supplemental Table 5
Supplemental Table 5
Sample	Slide	Age	ER	PGR	Her2	Node	Grade	Size	RFSE	MFS	Subtype	MVD AVG	MVD Scores/field
BC00086	H1A6261-2087V2	25	0	NA	0	1	3	2	0	9	Basal	49.4	79	71	63	43	46	39	28	44	38	43
PB419	H1A6261-2140V2	49	0	0	0	0	3	2	0	10	Basal	10.5	10	11
BC00078T	H1A4110_3579	68	0	0	0	1	3	3	0	12	Basal	16.4	16	12	14	19	18	11	21	17	17	19
PB297	H1A9529-0061C	55	0	0	0	0	3	2	0	18	Basal	16.1	12	11	27	12	8	16	23	14	20	18
PB334	H1A6433-2608V2_Na	50	0	0	0	0	3	1	0	19	Basal	18.1	11	9	8	11	22	23	28	25	26	18
BC00085	H1A6260-732	24	0	0	0	0	2	1	0	19	Basal	31.5	27	26	23	30	47	35	34	21	44	28
PB267	H1A7411-0085-C	44	0	0	0	1	3	2	0	20	Basal	34	41	27
BC00082T	H1A4110_3580	84	0	0	0	0	3	2	0	27	Basal	23.7	23	30	25	25	19	26	29	21	14	25
BC00029T	H1A_C_0078	44	0	0	0	1	3	NA	0	62	Basal	14.2	16	24	10	6	20	16	7	17	16	10
A1-17-Left-Primary-VIM	H1A9529-0094C	64	0	NA	0	1	3	4	1	2	Basal	27.3	35	41	27	23	22	31	22	25	20	27
BC00024T	H1A_C_0077	68	0	0	0	1	3	3	1	3	Basal	32.5	51	26	36	45	24	23	36	36	26	22
BC00064-RECUR	H1A6357_3552	44	0	0	1	NA	3	1	1	10	Basal	25.9	37	20	34	26	27	14	7	23	38	33
BR00-0572-VIM	H1A6433-2599V2	45	0	0	1	1	3	3	1	11	Basal	25	19	8	39	48	22	36	12	14	14	38
BC00041	H1A9529-039C	46	0	0	0	0	3	2	1	13	Basal	18.6	12	16	26	20	19	21	20	25	11	16
BC00070	H1A9529-0096C	38	0	0	0	0	2	2	1	22	Basal	34.8	48	43	38	27	30	45	29	38	22	28
BC00049T	H1A_C_0081	43	0	0	0	1	3	2	1	48	Basal	20.8	20	21	19	19	25
BC00048	H1A6730-735	77	0	NA	0	0	2	3	1	5	Claudin	22.4	20	21	17	29	24	32	17	17	22	25
BC00075_Repeat1	H1A7871-2424V2	72	0	NA	0	1	2	3	1	11	Claudin	21.6	26	16	15	25	26	20	20	23	23	22
BC00083	H1A6546-126	43	0	NA	0	1	3	2	1	33	Claudin	31	36	27	22	26	26	65	21	29	22	36
PB455	H1A6433-2812_V2	52	0	0	1	1	2	3	0	9	Her2	20.3	15	19	11	17	24	23	15	20	24	35
BC00036T	H1A_C_0079	55	0	0	1	1	2	2	0	10	Her2	30.5	55	34	28	55	29	16	16	33	16	23
PB314	H1A9529-0045C	51	0	0	1	1	3	3	0	21	Her2	27.5	23	20	20	30	27	37	32	29	28	29
BR00-0284	H1A6433-2611V2	63	0	0	1	0	3	3	0	43	Her2	8.7	5	11	10	12	12	14	12	4	3	4
BC00051	H1A9529-0040C_Na	51	0	0	0	0	2	2	0	68	Her2	17.7	16	31	21	12	12	16	14	16	24	15
BR94-187_Dup	H1AG4110A_4260	47	1	NA	0	1	2	4	1	1	Her2	15.5	17	19	19	10	15	14	19	11	0	0
BC00030-MET-post chemo	H1A6730-647	58	0	NA	1	1	2	4	1	8	Her2	16.3	17	12	20	23	10	20	16	11	11	23
BC00057-post-chemo	H1A6260-731	51	0	0	1	1	3	4	1	8	Her2	30.3	24	33	24	40	25	25	47	25	24	36
BC00055	H1A9529-0088C	56	0	NA	1	1	2	NA	1	12	Her2	25.8	22	30	36	29	22	27	21	22	27	22
BC00071	H1A9529-0089C	33	0	0	1	1	2	2	1	16	Her2	22.7	27	23	28	27	30	18	15	20	19	20
BC00010	H1A9529-39C_Na	47	0	0	1	1	2	3	1	16	Her2	58.5	59	58
BR94-1096	H1A6912-6958V2	82	1	1	NA	0	1	2	1	31	Her2	17.8333	11	25	21	24	12	14
01-0123B	H1A9529-0092C	49	0	0	0	1	2	3	1	31	Her2	33.3	20	67	47	29	23	58	47	21	10	11
PB475	H1A7411-0116-C	50	1	1	0	0	2	2	0	2	LumA	20.9	19	23	19	22	17	25	12	24	28	20
PB441	H1A7411-0113-C	83	1	1	0	0	2	1	0	9	LumA	29	33	31	21	37	41	28	22	37	18	22
PB277	H1A9529-0059C	46	1	1	0	1	3	2	0	12	LumA	17.9	29	18	20	19	17	16	9	11	22	18
PB370	H1A9529-0063C	67	1	1	0	1	3	2	0	20	LumA	27.8	31	39	38	38	37	17	24	18	20	16
BC00067	H1AUNC-0796-C	72	1	1	0	1	2	2	0	28	LumA	22.7	30	24	24	20	19	28	19	24	16	23
PB158	H1A9529-0003C	86	1	NA	NA	0	3	3	0	30	LumA	24.1	18	15	20	16	32	31	17	55	26	11
BR01-0246	H1A9529-0093C	36	1	1	0	1	2	2	0	31	LumA	46.1	54	49	55	37	56	31	47	39	45	48
BR00-0587-GATA3	H1A6433-2990V2	68	1	1	0	0	3	2	0	37	LumA	30.7	72	15	45	33	17	37	19	12	30	27
BR00-0504	H1A6433-2988V2	88	1	1	0	1	1	2	0	39	LumA	39	30	53	31	52	34	35	37	40	38	40
BR96-0014	H1A6912-6987V2	47	1	NA	0	1	1	4	0	96	LumA	17.25	41	8	9	11
BC00011	H1AUNC-0792-C	71	1	0	0	1	NA	2	0	105	LumA	19.2	16	23	18	20	11	18	19	24	26	17
BC00004	H1A9529-30C_Na	67	0	1	0	0	2	1	0	118	LumA	22.8	27	17	23	27	19	23	29	19	21	23
BR00-0387	H1A9529-025C_Na	57	1	1	0	1	2	4	1	6	LumA	47.1	72	50	37	51	34	46	38	24	65	54
BC00093-T	H1AUNC-0922-C	24	1	1	1	1	3	2	1	8	LumA	26	46	24	40	27	24	25	16	30	14	14
BC00042	H1AUNC-0919-C	79	1	1	0	1	2	2	1	14	LumA	36.7	39	27	36	35	45	44	35	35	40	31
BC00014	H1A9529-0045Na_C	69	0	0	0	1	3	4	1	18	LumA	17	21	16	14
BC00066	H1A9529-022-C	43	0	1	1	1	3	3	1	18	LumA	39	34	42	46	34	37	52	37	33	28	47
BC00072	H1AUNC-0920-C	48	1	1	0	1	2	2	1	46	LumA	22.7	32	32	24	27	26	24	21	7	18	16
BC00040	H1AUNC-0793-C	41	1	0	0	1	3	3	1	59	LumA	20.4	20	27	21	22	17	14	14	25	26	18
BC00079	H1AUNC-0943-C	80	1	0	0	0	3	2	0	6	LumB	25.5	25	40	18	19	25	19	29	19	21	40
PB249	H1A9529-0055C	36	1	1	1	1	3	1	0	8	LumB	21.6	21	17	17	20	21	27	17	17	24	35
PB307	H1A9529-0062C	35	1	1	0	0	3	3	0	9	LumB	20.6	25	17	15	21	25	14	18	26	22	23
PB293	H1A9529-0060C	56	1	1	0	0	2	2	0	11	LumB	19.5	26	16	15	20	20	15	20	25	20	18
BR00-0365	H1A_013Na_C	43	1	1	0	1	3	4	0	22	LumB	22.4	15	22	23	18	19	27	33	17	24	26
BC00061	H1AUNC-0794B-C	40	1	1	0	1	2	3	0	24	LumB	17.6	14	8	12	10	33	11	24	35	17	12
BR01-0125	H1A6433-2992V2	40	1	1	0	1	2	3	0	33	LumB	31.8	50	29	32	25	39	18	42	37	26	20
BR99-0207-GATA3	H1A7411-0066-C	84	1	0	0	1	2	2	0	57	LumB	33.1	47	38	28	12	30	37	25	31	42	41
BC00034	H1A9529-0041C_Na	68	0	0	0	0	2	1	0	81	LumB	17.6	24	22	18	16	16	23	15	15	17	10
BR95-0035	H1A6912-6984V2	74	0	0	0	1	3	2	0	106	LumB	17.6667	20	17	16
BC00017	H1AUNC-0789-C	41	1	0	0	1	NA	3	1	2	LumB	13.3	12	10	14	10	14	17	14	18	14	10
BR01-0349	H1A9529-0047C	37	1	0	1	1	3	3	1	3	LumB	35.3	47	43	35	54	36	21	25	30	40	22
BR00-0344	H1A9529-028C_Na	65	1	0	0	1	3	2	1	7	LumB	33.6	24	31	34	23	56	34	31	32	39	32
PB407	H1A6989-8228-V2	56	1	NA	0	1	3	3	1	9	LumB	20.5	19	23	25	24	23	24	14	18	15	20
BC00016	H1AUNC-0788-C	64	1	0	0	1	NA	2	1	17	LumB	44.6	50	48	32	48	45
BC00033	H1AUNC-0918-C	67	1	1	0	1	3	2	1	21	LumB	23.1	28	22	14	26	17	20	27	30	22	25
BR98-0161	H1A9529-0049C	57	0	0	0	1	2	2	1	36	LumB	33.4	44	37	28	26	29	40	28	38	33	31
BC00052-post-chemo	H1A9529-040C	47	0	0	1	1	3	2	1	14	Normal-like	36	38	30	39	42	31
BC00053	H1A6433-2608V2	71	0	0	1	1	3	2	1	27	Normal-like	30.5	34	9	7	44	23	45	44	38	32	29
